# Supplementary material
Source: PubMed Central journal article supplement (PMC11072877)

## Spinal cord

## Cerebellum

## Forebrain

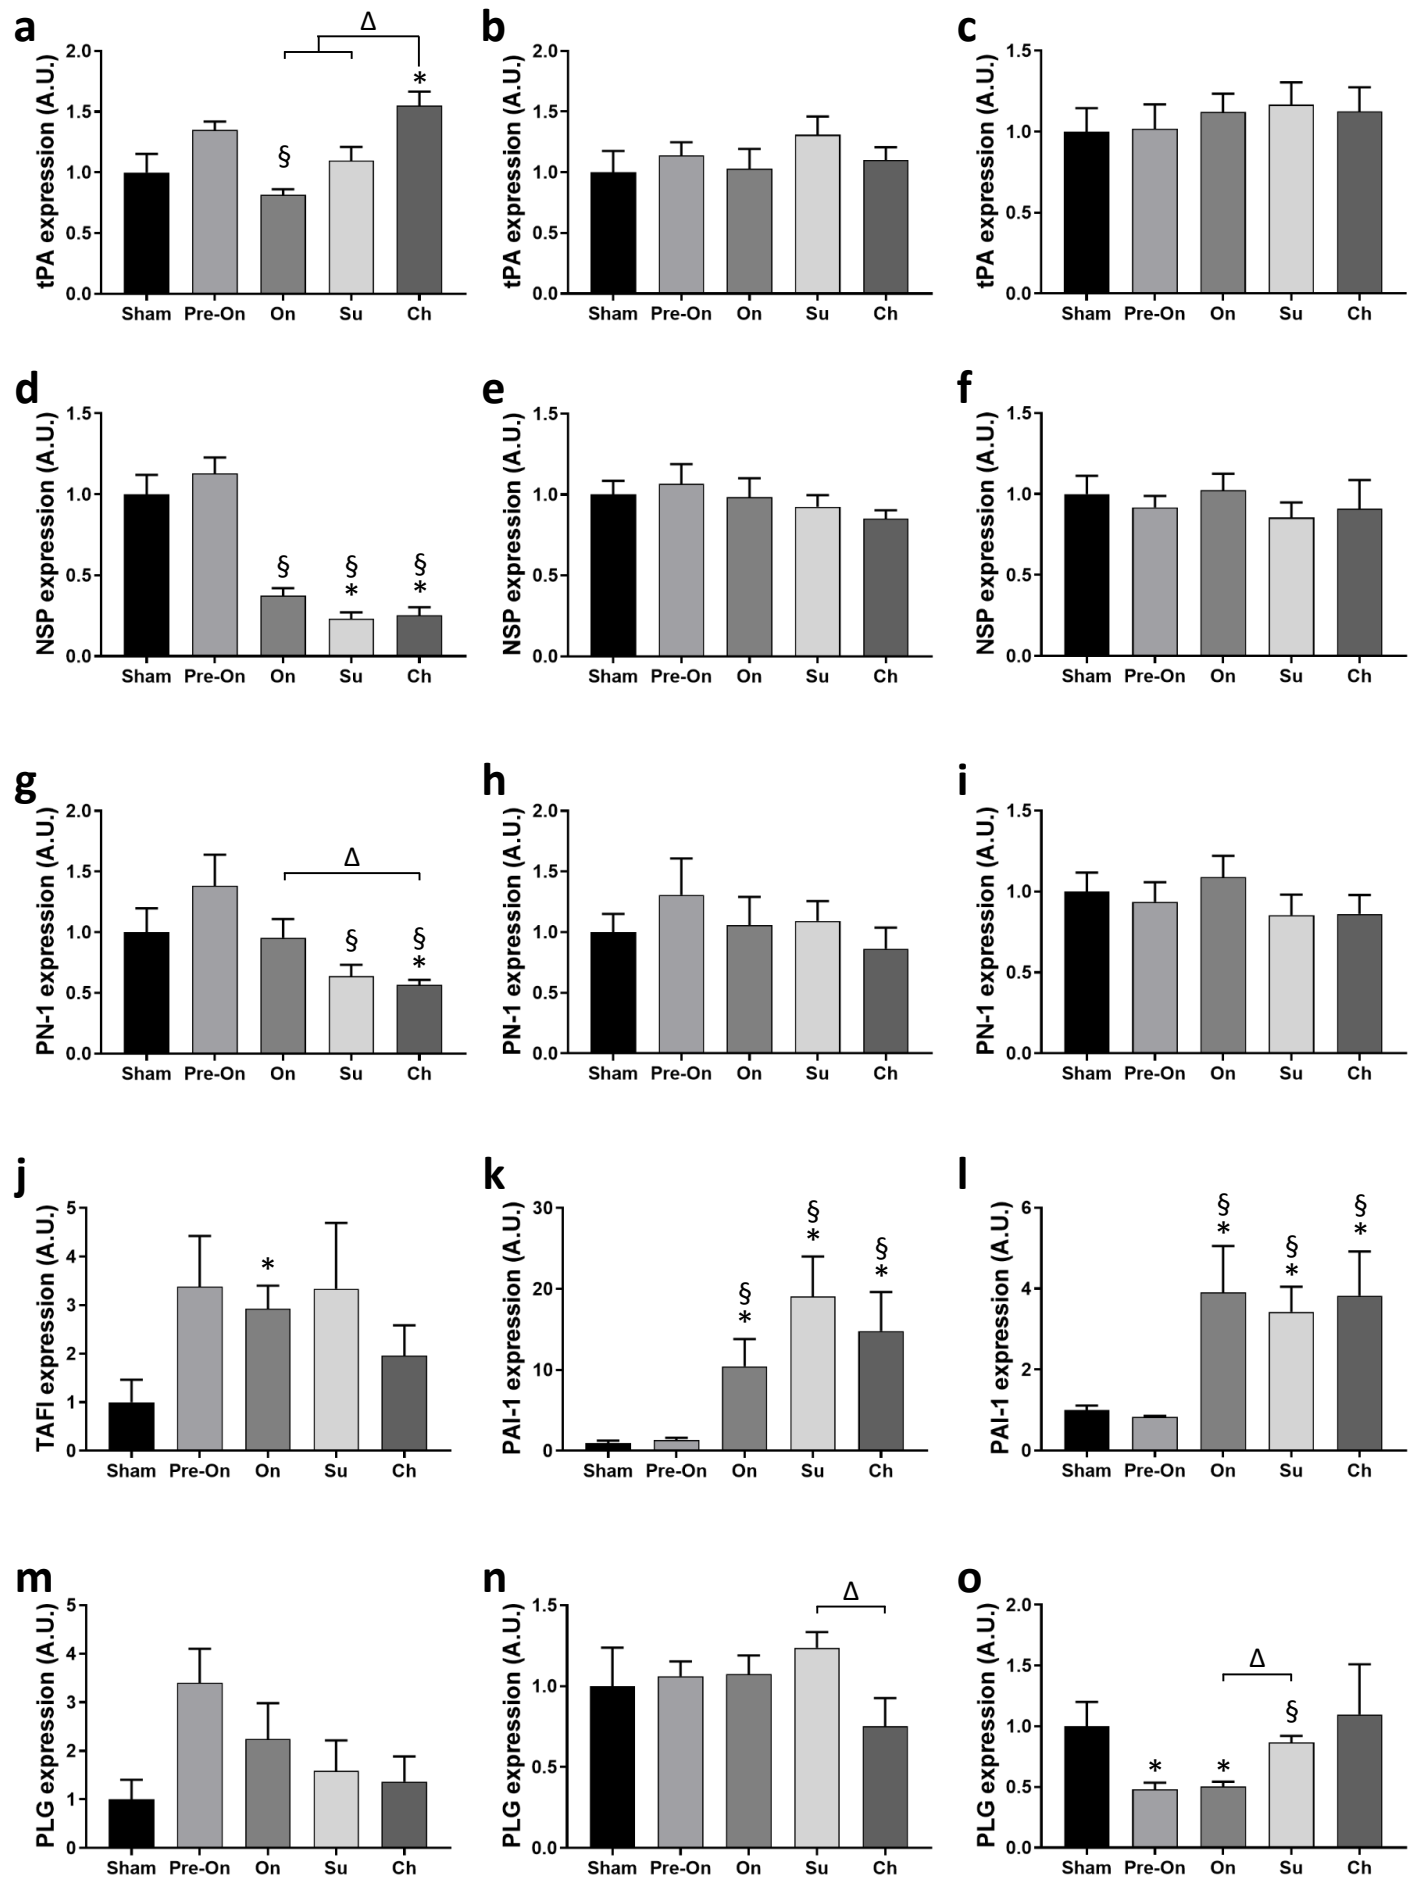

Supplement: 18_2022_4340_MOESM1_ESM.pdf [file 18_2022_4340_MOESM1_ESM.pdf]

## Spinal cord

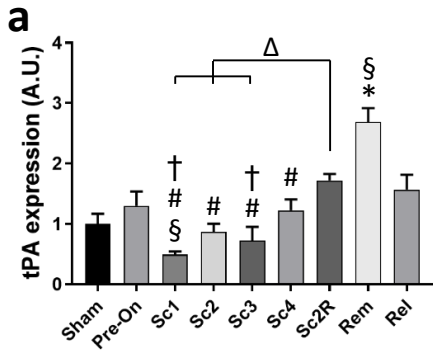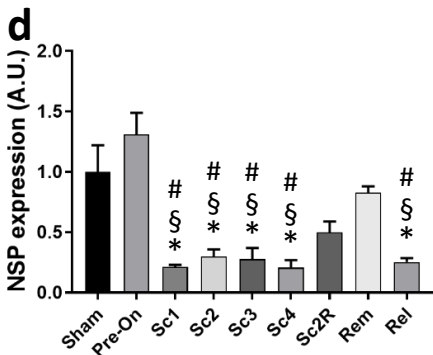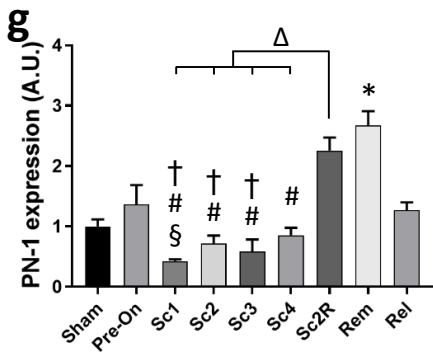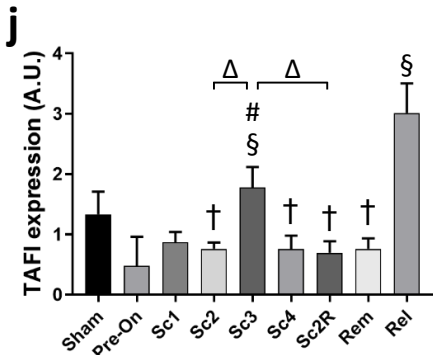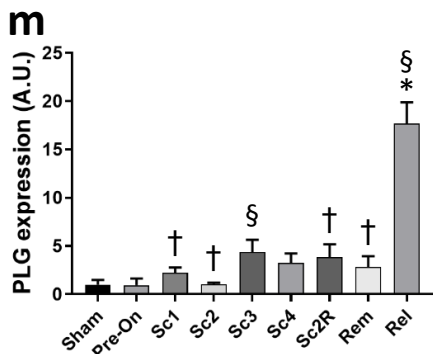

## Cerebellum

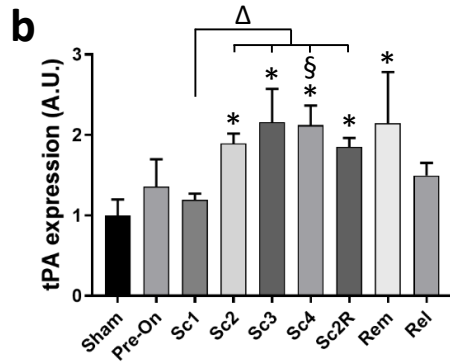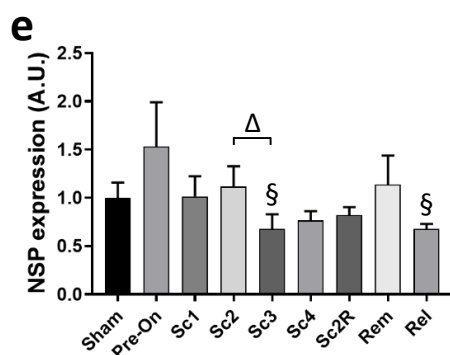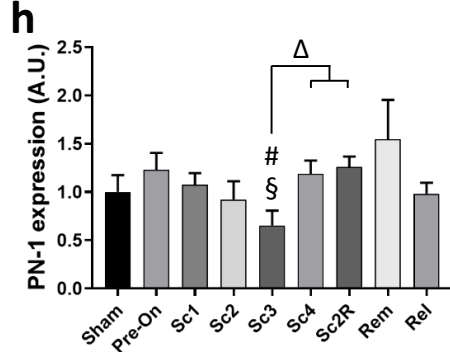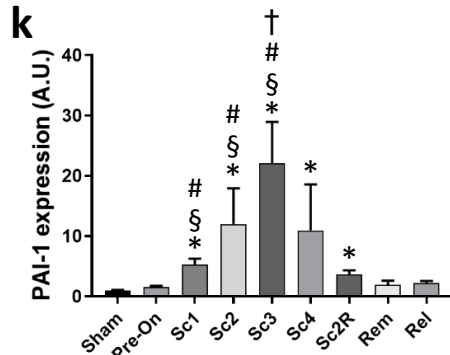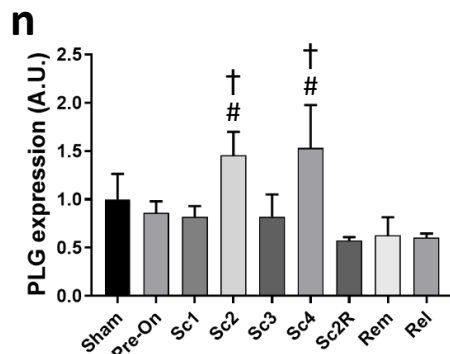

## Forebrain

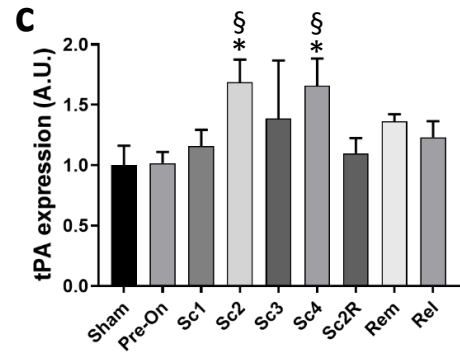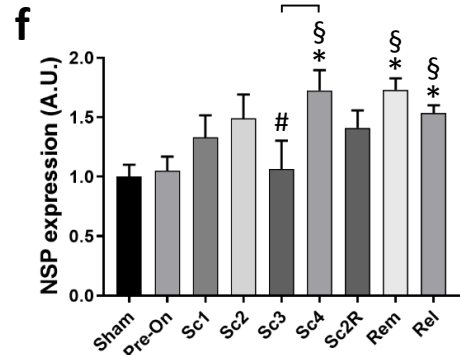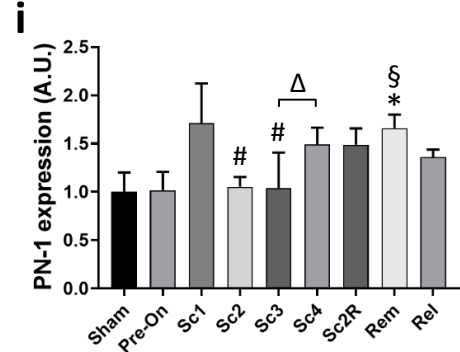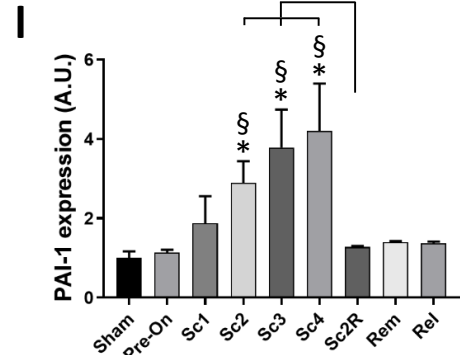

Supplement: 18_2022_4340_MOESM2_ESM.pdf [file 18_2022_4340_MOESM2_ESM.pdf]

a

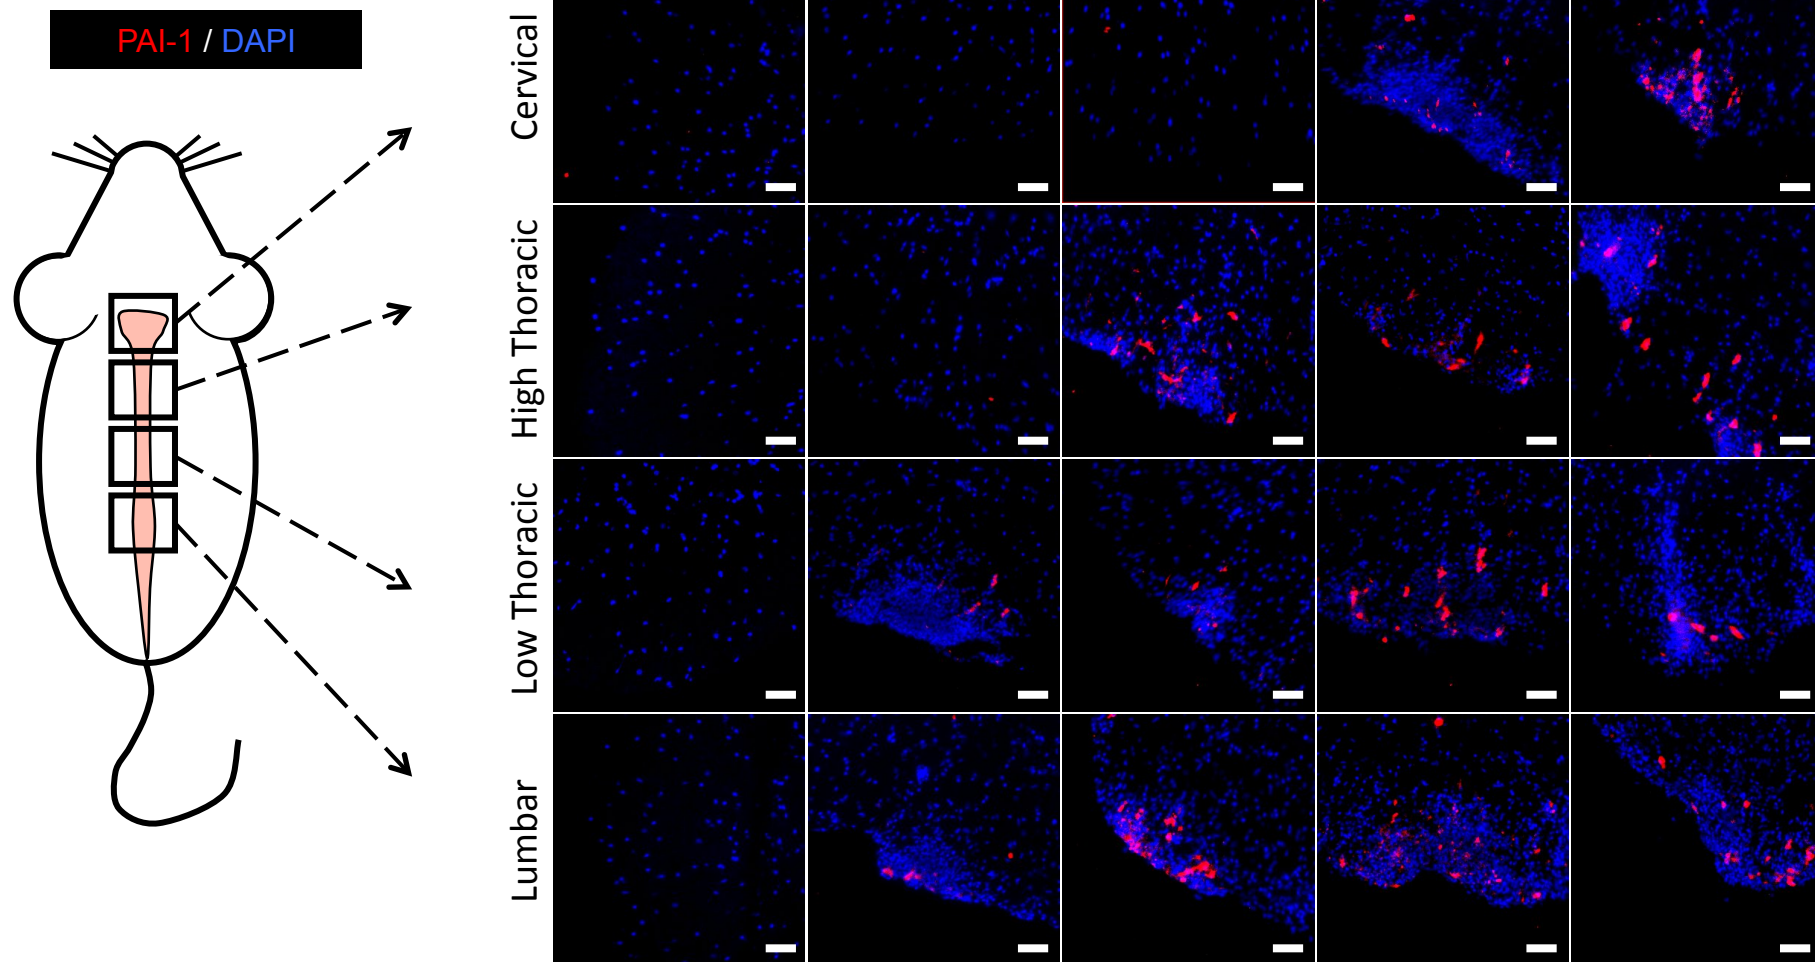

b

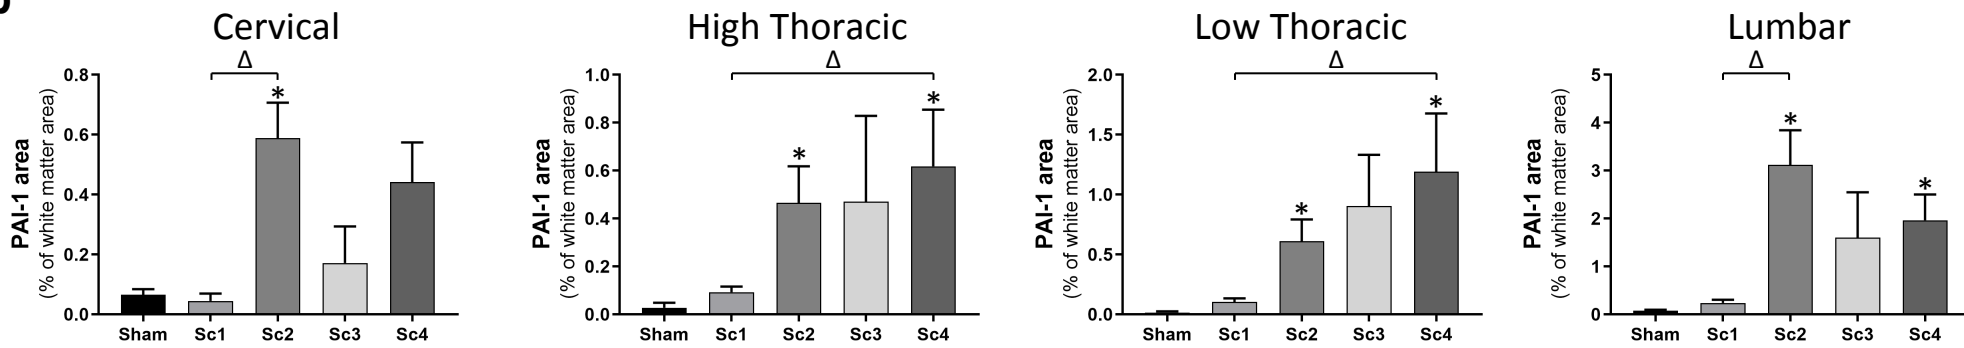

Supplement: 18_2022_4340_MOESM3_ESM.pdf [file 18_2022_4340_MOESM3_ESM.pdf]

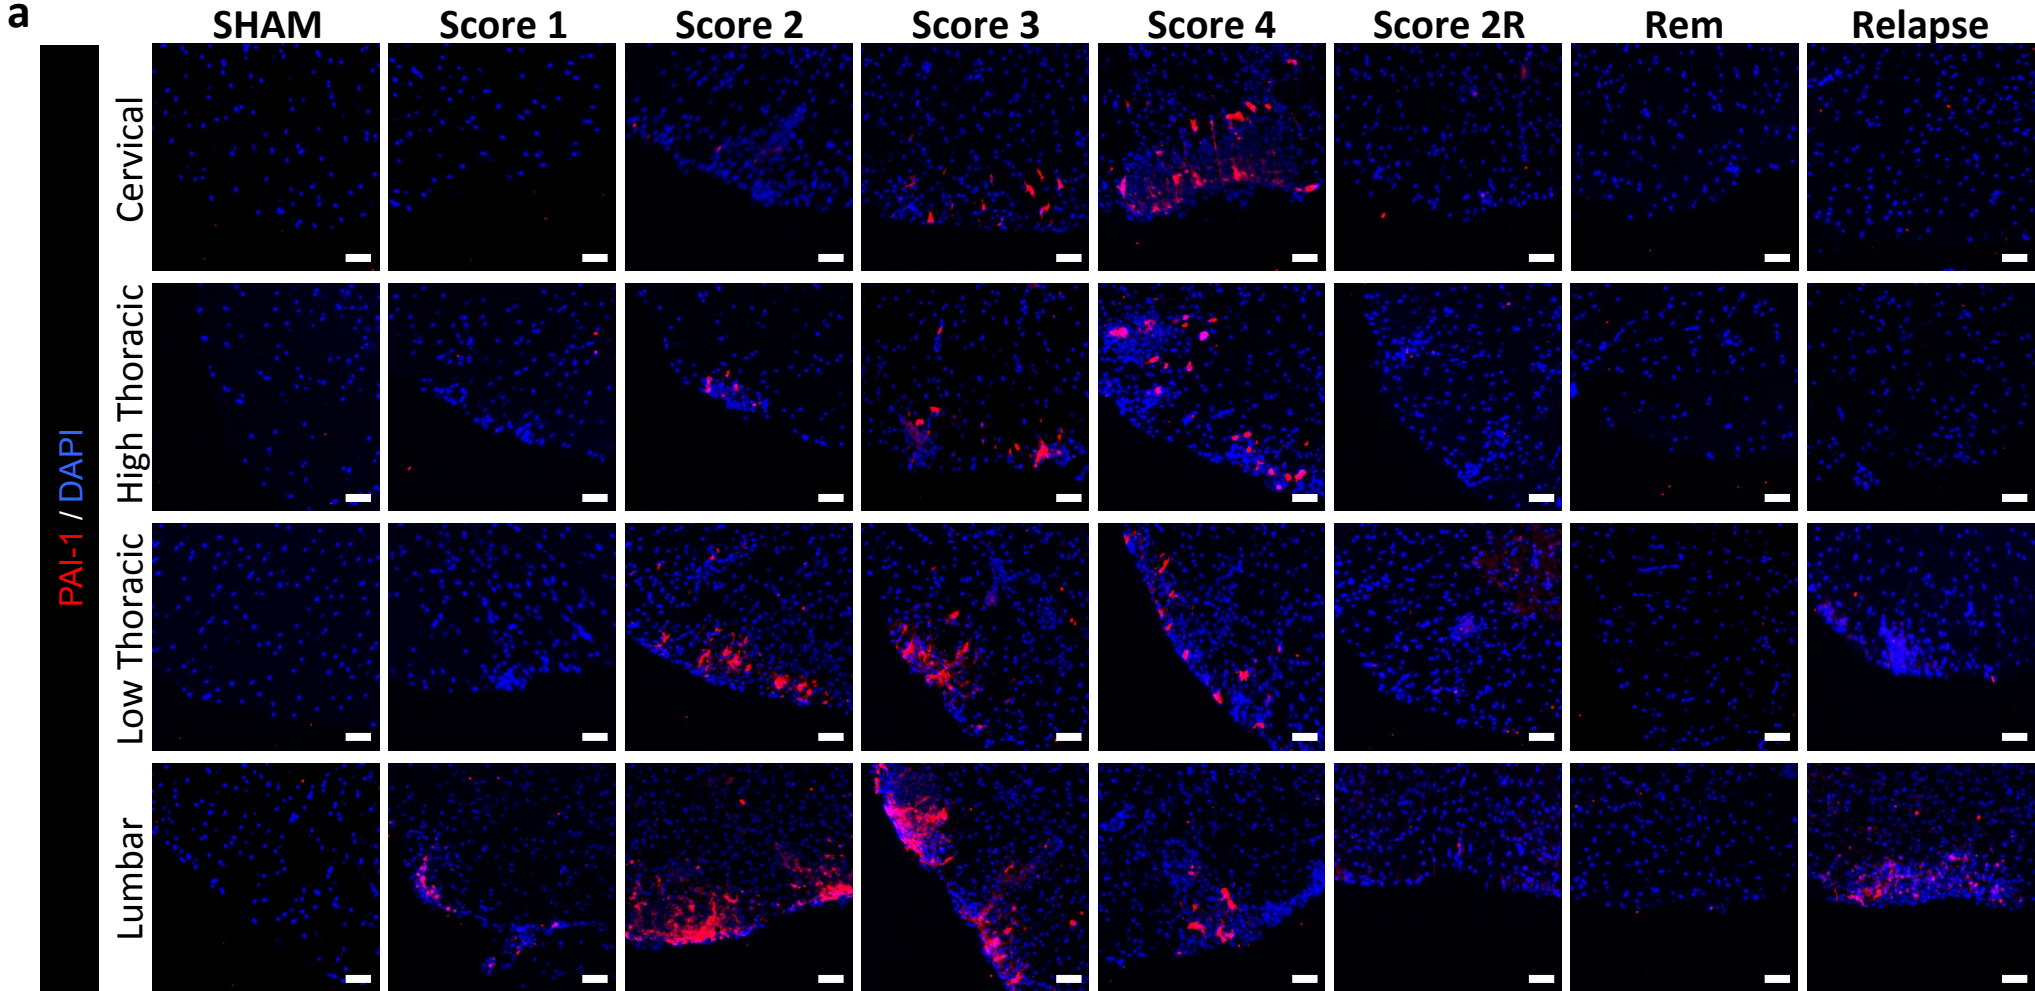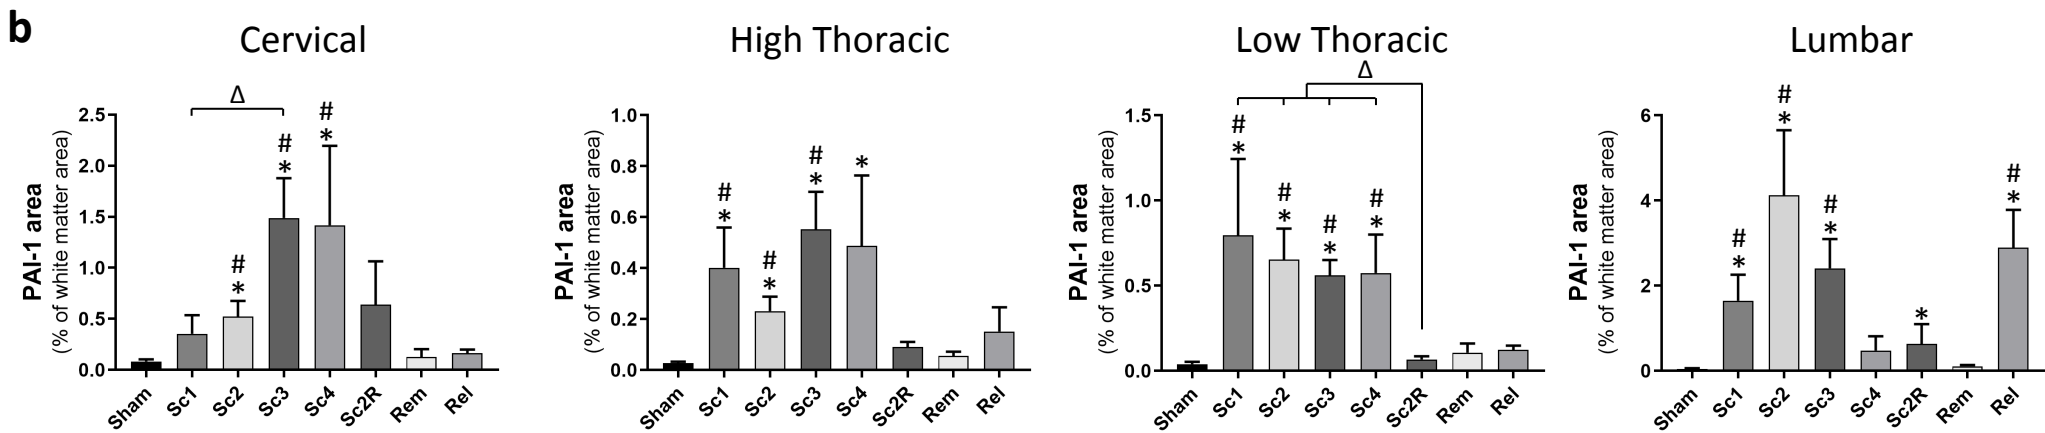

Supplement: 18_2022_4340_MOESM4_ESM.pdf [file 18_2022_4340_MOESM4_ESM.pdf]

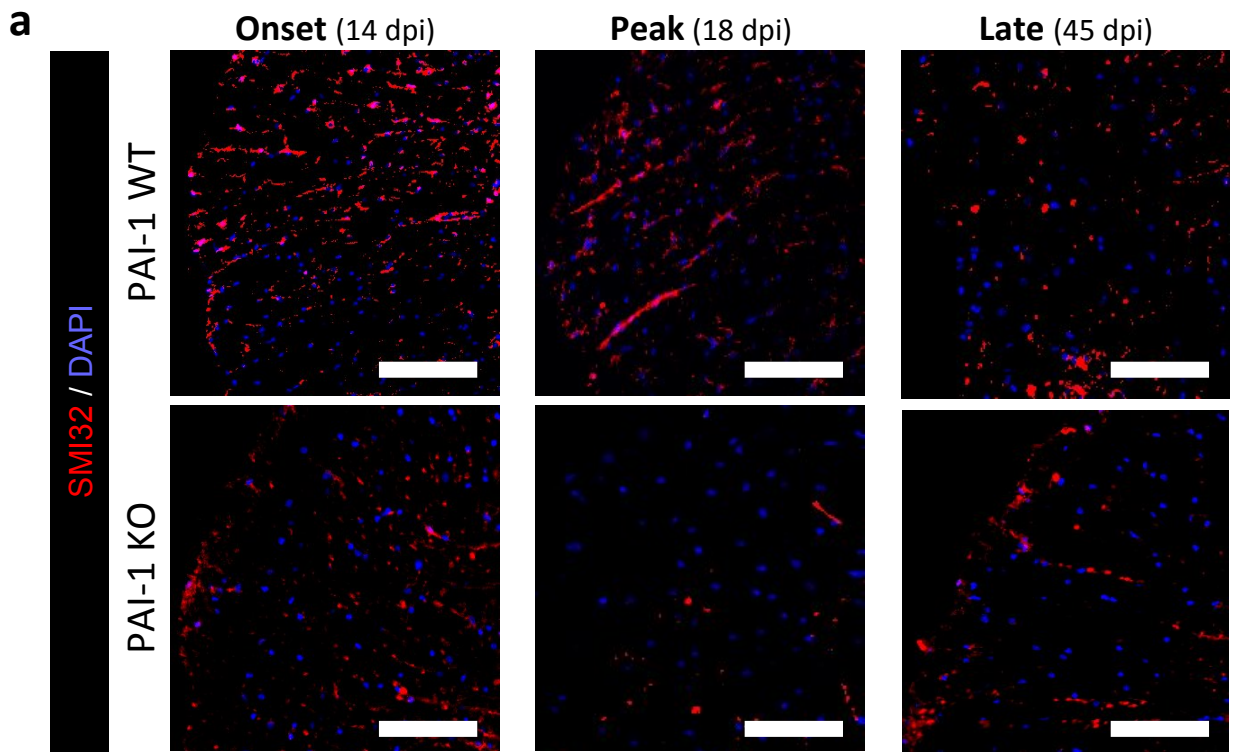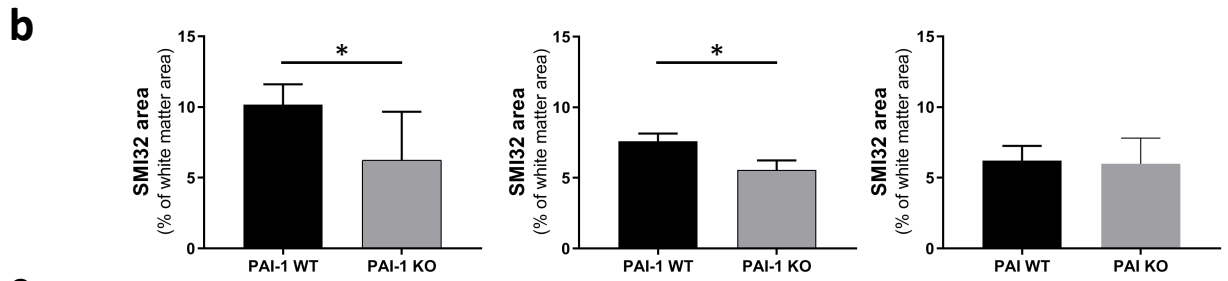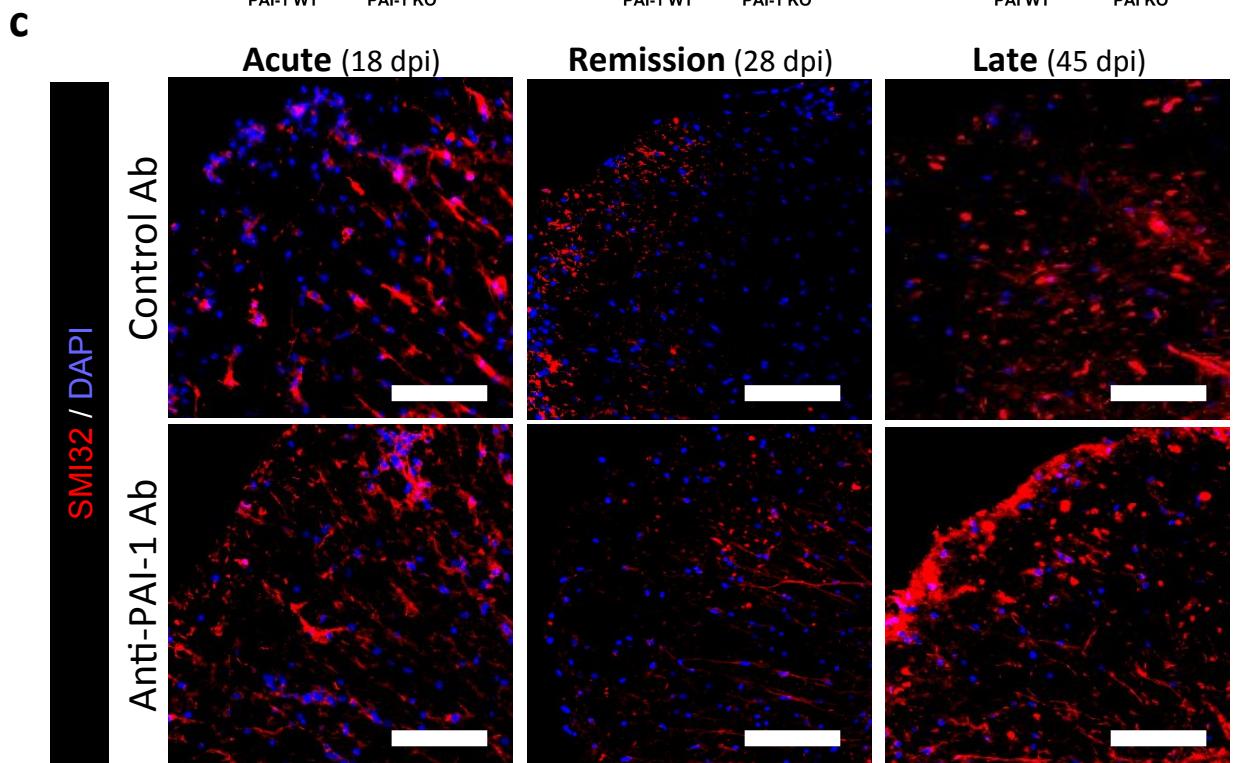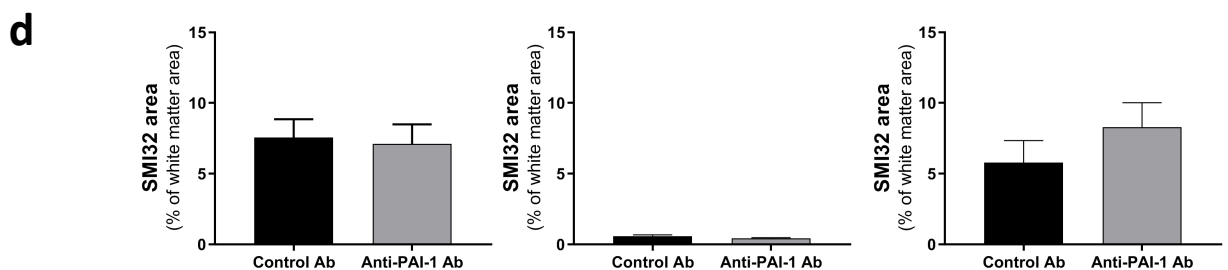

Supplement: 18_2022_4340_MOESM5_ESM.pdf [file 18_2022_4340_MOESM5_ESM.pdf]
